# Supplementary material for: Identification of quality markers for Cyanotis arachnoidea and analysis of its physiological mechanism based on chemical pattern recognition, network pharmacology, and experimental validation
Source: PeerJ. 2023 Sep 11;11:e15948. doi: 10.7717/peerj.15948 (PMC10501370; doi:10.7717/peerj.15948)
Supplement: Supplemental Information 4 [file peerj-11-15948-s004.xlsx]

## Sheet: Sheet1
The relative target protein expression level
	Control	Model	Low dose	Medium dose	High dose
P-PI3K 1/GAPDH	0.816819	0.149514	0.269608	0.48665	0.657767
P-PI3K 2/GAPDH	0.902998	0.141005	0.310049	0.447816	0.609223
P-PI3K 3/GAPDH	1.1403	0.151945	0.370098	0.669903	0.910194
P-AKT 1/GAPDH	1.15279	0.187196	0.248775	0.381068	0.56432
P-AKT 2/GAPDH	1.02415	0.205429	0.20098	0.390777	0.569175
P-AKT 3/GAPDH	0.835554	0.158023	0.305147	0.519417	0.730583
P-MAPK 1/GAPDH	0.144879	0.730551	0.550245	0.366505	0.271845
P-MAPK 2/GAPDH	0.14363	0.713533	0.515931	0.383495	0.28034
P-MAPK 3/GAPDH	0.167361	0.852107	0.640931	0.535194	0.372573
